# Supplementary material for: Psychosocial impact of the Covid-19 pandemic: Identification of most vulnerable populations
Source: bioRxiv or medRxiv preprint supplement (doi:10.1101/2021.03.20.21254029), 2021-03-22
Supplement: Supplementary file [file media-1.pdf]

**General demography**

|                                                                   |                                                                                                                                                                                 |
|-------------------------------------------------------------------|---------------------------------------------------------------------------------------------------------------------------------------------------------------------------------|
| How old are you?                                                  |                                                                                                                                                                                 |
| Which gender do you identify with?                                | male, female, non binary, I prefer not to say                                                                                                                                   |
| In which country do you live?                                     |                                                                                                                                                                                 |
| In which postal code do you live?                                 |                                                                                                                                                                                 |
| How would you define your civil status?                           | single, married, divorced, widow, in a couple                                                                                                                                   |
| Where do you live?                                                | my own house/apartment, shared house/apartment, in a rented room, institutionalized, I am homeless                                                                              |
| What level of education do you have? (check the maximum obtained) | primary education, secondary education, further education, bachelor degree, masters degree, doctoral degree                                                                     |
| What is your job?                                                 | skilled job, unskilled job, caring for others/home, I have a company, I am self-employed, I am a healthcare worker (or working in a healthcare setting, I am unemployed, others |

**Questions for the Scale of socio-economic precariousness**

|                                                                                                |                                                                                                                                                                                                                                 |
|------------------------------------------------------------------------------------------------|---------------------------------------------------------------------------------------------------------------------------------------------------------------------------------------------------------------------------------|
| Who provides financially at home?                                                              | For index scoring, sum of all points multiplied by 2.<br>>2 of us = 0 p, 2 of us = 1 p, only me = 2p                                                                                                                            |
| Have you lost your job due to the COVID-19 outbreak?                                           | no= 0 p; yes, the company made a temporary labour force adjustment plan= 1 p; yes, others = 1.5 p; yes, I was fired/the company made a labour force adjustment plan/ I have lost some jobs previously contracted/arranged = 2 p |
| Do you have savings?                                                                           | yes= 0 p, yes, some= 1 p, no = 2 p                                                                                                                                                                                              |
| Do you have a mortgage to pay?                                                                 | no = 0 p; yes, one =1 p; yes, more than 1 = 2 p                                                                                                                                                                                 |
| Do you have rent to pay?                                                                       | no = 0 p, yes =2 p                                                                                                                                                                                                              |
| Are you spending less since the COVID-19 outbreak?                                             | no = 0 p; a little = 1 p; yes =2 p                                                                                                                                                                                              |
| Have you asked for social assistance or for any other assistance due to the COVID-19 outbreak? | no = 0 p; no, but will have to = 1 p; yes =2 p                                                                                                                                                                                  |
| Do you have to take care of somebody? (multiple choice question)                               | no = 0 p; yes (any answer: children <16 y.o., >16 y.o, parents, siblings, others) = 1 p per positive answer.                                                                                                                    |

**Habits and COVID-19-related health status during confinement**

|                                                                                                                                   |                                                                                                                                                                                                                                                                                                                                                                             |
|-----------------------------------------------------------------------------------------------------------------------------------|-----------------------------------------------------------------------------------------------------------------------------------------------------------------------------------------------------------------------------------------------------------------------------------------------------------------------------------------------------------------------------|
| (If having children): In which grade do you think the confinement is being difficult for children (and therefore for the family)? | scale of potential answer, 0 being= not at all and 10= a lot                                                                                                                                                                                                                                                                                                                |
| Are you staying at home, during this time?                                                                                        | yes; yes, I am teleworking; no, I work in essential services; no, I need to work; no, my employer does not allow me to                                                                                                                                                                                                                                                      |
| Are you scared or worried?                                                                                                        | no; yes, of getting infected; yes, of going to the shops; yes, of infecting others; yes, that people close to me get infected                                                                                                                                                                                                                                               |
| Who are you scared of infecting?                                                                                                  | the children, my parents/close elderly people; my colleagues; anyone                                                                                                                                                                                                                                                                                                        |
| Do you think you are consuming more since the outbreak began?                                                                     | no; yes, I eat more; yes, I drink more (alcoholic drinks); yes, I smoke more; yes, I consume more illegal drugs; yes, I consume more drugs to calm myself down (sleeping pills, muscle relaxants, tranquilizers)                                                                                                                                                            |
| Through which channel do you receive information about the outbreak?                                                              | TV; Radio; Newspaper; Social media (Whatsapp, Twitter, Telegram etc.); Other channels                                                                                                                                                                                                                                                                                       |
| What do you think of the information you are receiving?                                                                           | It's too much: I would like the Government to explain less; It's too little: I would like the media to explain less; It's too little : I would like the Government to explain more; It's too little : I would like the media to explain more; It's too negative/too sensationalist; I think it's poorly adjusted to reality; It's alright; I do not think anything about it |
| Do you think this situation has changed you?                                                                                      | no; yes, my life has changed; yes, my personality had changed; yes, the way I see society/the way we lived                                                                                                                                                                                                                                                                  |
| Have you been in contact with someone infected by SARS-CoV-2?                                                                     | yes, with a confirmed case (test positive); yes, with a probable non-confirmed case (test negative or test not done); I do not know                                                                                                                                                                                                                                         |
| Since February, have you had any of these symptoms?                                                                               | no; persistent cough (for one week or more); headache; persistent fever (for one week or more); extreme fatigue/tiredness; sore throat; muscle pain; loss of appetite/weight; loss of smell, smell blindness; loss of taste; diarrhea; dizziness; shortness of breath; chest pain; nasal congestion/running nose                                                            |
| How do you feel now?                                                                                                              | well, normal, I do not feel at 100%, bad                                                                                                                                                                                                                                                                                                                                    |
| In the last 14 days, have you used any healthcare resources put in place for the COVID-19 pandemic?                               | have called a telephone number set up for the management of COVID cases; have gone to the emergency room; have used an app set up for management of COVID cases; have been to a public healthcare center (including GP); have been to private doctor/healthcare center; have been tested; none of the above                                                                 |
| If you were tested, what was the result?                                                                                          | positive, negative                                                                                                                                                                                                                                                                                                                                                          |

**For HealthCare workers**

|                                                     |                                                                                                                                                                                                                                                                                                             |
|-----------------------------------------------------|-------------------------------------------------------------------------------------------------------------------------------------------------------------------------------------------------------------------------------------------------------------------------------------------------------------|
| What is your job?                                   | physician, nurse, nurse assistant, technician, caretaker, researcher, kitchen personnel, cleaning personnel, administrative personnel, others                                                                                                                                                               |
| Have you been working with COVID patients directly? | no; not as far as I know; yes, I have been/am in a COVID team; yes, on duty                                                                                                                                                                                                                                 |
| Are you scared of working with COVID patients?      | no; yes, o being infected; yes, of dying; yes, of transmitting the virus to other non-COVID patients; yes, of transmitting the virus to my people (family/colleagues); yes, of being obliged to take medical decisions representing an ethical dilemma for me (patient selection, application of protocols) |
| Have you had ethical concerns while working?        | no; no, I think I need to follow the protocols; yes, with selection of patients and/or protocols for selection of patients or therapeutic indications; yes, others                                                                                                                                          |

**Questions related to mental-health**

**Scoring**

**Questions related to anxiety- How these sentences apply to you?**

|                                                                                                                                                            |
|------------------------------------------------------------------------------------------------------------------------------------------------------------|
| For each of the questions below: never = 0 p, sometimes = 1 p, often = 2 p, almost always = 3 p. For the index scoring, sum of all points multiplied by 2. |
| last week I was aware of dryness of my mouth                                                                                                               |
| last week I experienced breathing difficulty (excessively rapid breathing, breathlessness in the absence of any physical exertion and absence of any)      |
| last week I experienced trembling (eg in the hands)                                                                                                        |
| last week I was worried about situations in which I might panic and make a fool of myself                                                                  |
| last week I felt I was close to panic                                                                                                                      |
| last week I was aware of the action of my heart in the absence of physical exertions (sense of heart rate increase, heart missing a beat)                  |
| last week I felt scared without any good reason                                                                                                            |

**Questions related to stress- How these sentences apply to you?**

|                                                                                                                                                            |
|------------------------------------------------------------------------------------------------------------------------------------------------------------|
| For each of the questions below: never = 0 p, sometimes = 1 p, often = 2 p, almost always = 3 p. For the index scoring, sum of all points multiplied by 2. |
| last week I found it hard to wind down                                                                                                                     |
| last week I tended to over-react to situations                                                                                                             |
| last week I felt that I was using a lot of nervous energy                                                                                                  |
| last week I found myself getting agitated                                                                                                                  |
| last week I found it difficult to relax                                                                                                                    |
| last week I was intolerant of anything that kept me from getting on with what I was doing                                                                  |
| last week I felt that I was rather touchy                                                                                                                  |

**Questions related to depression- How these sentences apply to you?**

|                                                                                                                                                            |
|------------------------------------------------------------------------------------------------------------------------------------------------------------|
| For each of the questions below: never = 0 p, sometimes = 1 p, often = 2 p, almost always = 3 p. For the index scoring, sum of all points multiplied by 2. |
| last week I couldn't seem to experience any positive feeling at all                                                                                        |
| last week I found it difficult to work up the initiative to do things                                                                                      |
| last week I felt that I had nothing to look forward to                                                                                                     |
| last week I felt down-hearted and blue                                                                                                                     |
| last week I was unable to become enthusiastic about anything                                                                                               |
| last week I felt that life was meaningless                                                                                                                 |

**Questions related to PTSD symptoms- How these sentences apply to you?**

|                                                                                                                                                                        |
|------------------------------------------------------------------------------------------------------------------------------------------------------------------------|
| For each of the questions below: 0= not at all, 1= a little bit, 2= moderately, 3= quite a bit, 4=extremely. For the index scoring, sum of all points multiplied by 2. |
| <b>Questions related to Intrusion symptoms</b>                                                                                                                         |
| last week any reminder brought back feelings about it                                                                                                                  |
| last week I had trouble staying asleep                                                                                                                                 |
| last week other things kept making me think about it.                                                                                                                  |
| last week I thought about it when I didn't mean to                                                                                                                     |
| last week Pictures about it popped into my mind                                                                                                                        |
| last week I found myself acting or feeling like I was back at that time                                                                                                |
| last week I had waves of strong feelings about it                                                                                                                      |

**Questions related to Avoidance symptoms**

|                                                                                                                                                            |
|------------------------------------------------------------------------------------------------------------------------------------------------------------|
| For each of the questions below: never = 0 p, sometimes = 1 p, often = 2 p, almost always = 3 p. For the index scoring, sum of all points multiplied by 2. |
| last week I avoided letting myself get upset when I thought about it or was reminded of it                                                                 |
| last week I felt as if it hadn't happened or wasn't real                                                                                                   |
| last week I stayed away from reminders of it.                                                                                                              |
| last week I thought about it when I didn't mean to                                                                                                         |
| last week I was aware that I still had a lot of feelings about it, but I didn't deal with them                                                             |
| last week My feelings about it were kind of numb                                                                                                           |
| last week I tried to remove it from my memory                                                                                                              |
| last week I tried not to talk about it                                                                                                                     |

**Questions related to Hyperarousal symptoms**

|                                           |
|-------------------------------------------|
| last week I felt irritable and angry      |
| last week I was jumpy and easily startled |
| last week I had trouble falling asleep    |
| last week I had trouble concentrating     |
| last week I felt watchful and on-guard    |
