# Supplementary material for: Psychosocial impact of the Covid-19 pandemic: Identification of most vulnerable populations
Source: bioRxiv or medRxiv preprint supplement (doi:10.1101/2021.03.20.21254029), 2021-03-22
Supplement: Supplementary file [file media-2.pdf]

| ANSWER CATEGORIES                                  |                                                                | Conditional distributions given the responders gender (%) |       |            |            | p (women vs men) | Conditional distributions given the responders age range (%) |             |             |          | p      |
|----------------------------------------------------|----------------------------------------------------------------|-----------------------------------------------------------|-------|------------|------------|------------------|--------------------------------------------------------------|-------------|-------------|----------|--------|
|                                                    |                                                                | women                                                     | men   | non binary | not saying |                  | <42 y.o.                                                     | 42- 52 y.o. | 52- 61 y.o. | >61 y.o. |        |
| Civil status                                       | Married                                                        | 51.04                                                     | 60.21 | 14.77      | 27.94      |                  | 32.2                                                         | 56.74       | 61.12       | 63.22    |        |
|                                                    | Divorced                                                       | 11.75                                                     | 7.94  | 5.68       | 16.17      |                  | 2.52                                                         | 11.33       | 15.14       | 13.08    |        |
|                                                    | In couple                                                      | 18.40                                                     | 17.39 | 39.77      | 23.52      |                  | 38.02                                                        | 18.34       | 10.91       | 6.85     |        |
|                                                    | Single                                                         | 14.51                                                     | 12.89 | 38.63      | 30.88      |                  | 27.15                                                        | 12.85       | 10.06       | 7.2      |        |
|                                                    | Widow                                                          | 4.18                                                      | 1.54  | 1.13       | 1.47       |                  | 0.08                                                         | 0.71        | 2.75        | 9.63     |        |
| Housing                                            | Owned apartment/house                                          | 91.08                                                     | 90.89 | 64.36      | 72.46      |                  | 79.44                                                        | 94.22       | 95.08       | 94.48    |        |
|                                                    | Shared apartment/house                                         | 7.7                                                       | 7.9   | 26.43      | 23.18      |                  | 18.43                                                        | 4.9         | 4.11        | 4.33     |        |
|                                                    | Rented room                                                    | 1.05                                                      | 1.07  | 8.04       | 0.00       |                  | 2.01                                                         | 0.81        | 0.67        | 0.83     | p<0.01 |
|                                                    | Centre/institution                                             | 0.13                                                      | 0.09  | 0.00       | 0.00       |                  | 0.05                                                         | 0.03        | 0.09        | 0.3      |        |
|                                                    | Homeless                                                       | 0.02                                                      | 0.03  | 1.14       | 4.34       |                  | 0.05                                                         | 0.01        | 0.02        | 0.03     |        |
| Maximum Education Degree                           | Primary Education                                              | 3.52                                                      | 4.63  | 5.68       | 5.79       |                  | 1.53                                                         | 3.3         | 4.24        | 6.1      |        |
|                                                    | Secondary Education                                            | 5.18                                                      | 6.17  | 3.4        | 1.44       |                  | 4.83                                                         | 4.49        | 5.19        | 7.19     |        |
|                                                    | High School                                                    | 29.92                                                     | 35.46 | 29.54      | 28.98      |                  | 27.54                                                        | 30.98       | 34.17       | 33.11    | p<0.01 |
|                                                    | Degree                                                         | 44.99                                                     | 36.96 | 31.81      | 33.33      |                  | 38.72                                                        | 43.92       | 43.48       | 44.26    | p<0.01 |
|                                                    | Master                                                         | 13.47                                                     | 12.77 | 26.13      | 21.73      |                  | 24.32                                                        | 14.3        | 9.7         | 5.65     |        |
| Employment                                         | PhD                                                            | 2.9                                                       | 3.98  | 3.4        | 8.69       |                  | 3.03                                                         | 2.99        | 3.2         | 3.67     |        |
|                                                    | Qualified job                                                  | 36.95                                                     | 34.15 | 35.22      | 37.68      |                  | 48.19                                                        | 48.76       | 41.3        | 7.86     |        |
|                                                    | Non qualified job                                              | 3.51                                                      | 3.78  | 9.09       | 2.89       |                  | 4.39                                                         | 4.46        | 4.49        | 1.15     |        |
|                                                    | Job in Healthcare                                              | 10.9                                                      | 4.67  | 9.09       | 1.44       |                  | 12.16                                                        | 10.58       | 9.21        | 4.64     |        |
|                                                    | Home/people care                                               | 6.24                                                      | 1.42  | 0.00       | 2.89       |                  | 0.94                                                         | 1.69        | 3.25        | 12.86    | 0-0.01 |
| People financially providing at home               | Self-employed                                                  | 8.03                                                      | 11.41 | 9.09       | 15.94      |                  | 7.72                                                         | 11.45       | 11.4        | 5.59     |        |
|                                                    | Company owner                                                  | 3.00                                                      | 7.36  | 1.13       | 1.44       |                  | 2.39                                                         | 5.66        | 5.9         | 3.05     |        |
|                                                    | Unemployed                                                     | 5.29                                                      | 4.54  | 12.5       | 11.59      |                  | 7.63                                                         | 4.62        | 5.61        | 2.69     |        |
|                                                    | Other                                                          | 26.03                                                     | 32.63 | 23.86      | 26.08      |                  | 16.54                                                        | 12.73       | 18.8        | 62.13    |        |
|                                                    | 2                                                              | 8.03                                                      | 7.05  | 14.77      | 16.41      |                  | 13.59                                                        | 3.99        | 7.26        | 6.43     |        |
| Care of someone                                    | 2                                                              | 66.29                                                     | 68.57 | 54.54      | 55.22      |                  | 70.39                                                        | 71.65       | 64.94       | 61.18    |        |
|                                                    | 1                                                              | 25.67                                                     | 24.37 | 30.68      | 28.35      |                  | 16012.00                                                     | 24.35       | 27.78       | 32.38    |        |
|                                                    | No                                                             | 16.55                                                     | 47.61 | 58.94      | 34.66      |                  | 45.98                                                        | 16.26       | 31.39       | 67.82    |        |
|                                                    | Yes, of people of <16 y.o.                                     | 25.99                                                     | 21.93 | 13.68      | 25.33      |                  | 33.96                                                        | 48.69       | 13.52       | 3.07     |        |
|                                                    | Yes, of people of >16 y.o.                                     | 13.02                                                     | 10.35 | 6.31       | 6.66       | <0.01            | 4.81                                                         | 12.58       | 23.54       | 6.73     | <0.01  |
| Burden of care                                     | Yes, siblings                                                  | 1.36                                                      | 0.96  | 4.21       | 2.66       |                  | 1.57                                                         | 0.86        | 1.33        | 1.28     |        |
|                                                    | Yes, parents                                                   | 16.1                                                      | 12.66 | 10.52      | 17.33      |                  | 8.41                                                         | 16.92       | 23.03       | 10.92    |        |
|                                                    | Yes, others                                                    | 6.95                                                      | 6.46  | 6.31       | 13.33      |                  | 5.24                                                         | 4.66        | 7.17        | 10.16    |        |
|                                                    | None                                                           | 40.62                                                     | 51.34 |            |            |                  | 48.85                                                        | 18.85       | 35.96       | 70.47    |        |
|                                                    | 1 option selected                                              | 25.9                                                      | 22.11 | 11.3       | 5.79       |                  | 13.12                                                        | 21.03       | 39.98       | 24.24    |        |
| Loss of job                                        | 2 options selected                                             | 28.23                                                     | 22.83 |            |            |                  | 34.82                                                        | 49.43       | 19.32       | 4.51     | <0.01  |
|                                                    | 3 options selected                                             | 4.77                                                      | 3.39  |            |            |                  | 2.82                                                         | 9.88        | 4.31        | 0.61     |        |
|                                                    | 4 options selected                                             | 0.41                                                      | 0.30  |            |            |                  | 0.31                                                         | 0.73        | 0.38        | 0.11     |        |
|                                                    | 5 options selected                                             | 0.04                                                      | 0.01  |            |            |                  | 0.04                                                         | 0.04        | 0.02        | 0.02     |        |
|                                                    | No                                                             | 76.13                                                     | 72.73 | 63.63      | 65.21      |                  | 68.4                                                         | 69.41       | 73.65       | 88.18    |        |
| Savings                                            | Yes, the company made a labour force adjustment plan           | 0.18                                                      | 0.17  | 0.00       | 0.00       |                  | 0.22                                                         | 0.26        | 0.15        | 0.09     |        |
|                                                    | Yes, the company made a temporary labour force adjustment plan | 9.70                                                      | 10.01 | 9.09       | 7.24       | <0.01            | 14.5                                                         | 13.04       | 9.9         | 2.17     | <0.01  |
|                                                    | Yes, I have lost some jobs previously contracted/arranged      | 4.93                                                      | 7.61  | 15.9       | 14.49      |                  | 6.75                                                         | 7.17        | 6.68        | 2.54     |        |
|                                                    | Yes, I was fired                                               | 0.96                                                      | 0.68  | 2.27       | 0.00       |                  | 1.79                                                         | 0.96        | 0.67        | 0.16     |        |
|                                                    | Yes, others                                                    | 8.08                                                      | 8.77  | 9.09       | 13.04      |                  | 8.3                                                          | 9.12        | 8.3         | 6.83     |        |
| Mortgage to pay                                    | No                                                             | 22.00                                                     | 18.00 | 30.00      | 26.00      |                  | 20.34                                                        | 24.48       | 22.21       | 15.82    |        |
|                                                    | Yes                                                            | 34.00                                                     | 40.00 | 23.00      | 28.00      | <0.01            | 36.22                                                        | 32.37       | 33.65       | 40.55    | <0.01  |
|                                                    | None                                                           | 44.00                                                     | 42.00 | 48.00      | 46.00      |                  | 43.43                                                        | 43.14       | 44.13       | 43.62    |        |
|                                                    | Yes, one                                                       | 58.75                                                     | 59.47 | 80.68      | 57.97      |                  | 64.04                                                        | 59.65       | 54.68       | 76.91    |        |
|                                                    | Yes, more than one                                             | 36.17                                                     | 34.37 | 18.18      | 36.23      | <0.01            | 31.76                                                        | 50.8        | 39.81       | 20.66    | <0.01  |
| Rent to pay                                        | 5.07                                                           | 6.14                                                      |       |            |            | 4.18             | 5.44                                                         | 5.49        | 2.43        |          |        |
|                                                    | No                                                             | 76.00                                                     | 76.00 | 51.00      | 66.00      |                  | 56.64                                                        | 75.05       | 83.23       | 87.08    |        |
|                                                    | Yes                                                            | 24.00                                                     | 24.00 | 49.00      | 34.00      |                  | 43.35                                                        | 24.94       | 16.76       | 12.91    | <0.01  |
|                                                    | Yes                                                            | 59.85                                                     | 62.61 | 59.09      | 69.56      |                  | 64.15                                                        | 58.86       | 60.9        | 59.52    |        |
|                                                    | A little                                                       | 22.34                                                     | 21.56 | 13.63      | 17.39      |                  | 19.89                                                        | 23.74       | 22.72       | 21.87    |        |
| Seek for social assistance/or any other assistance | No                                                             | 17.80                                                     | 15.82 | 27.27      | 13.04      |                  | 15.95                                                        | 17.38       | 16.87       | 18.59    |        |
|                                                    | No                                                             | 91.42                                                     | 90.8  | 80.68      | 81.15      |                  | 88.95                                                        | 88.41       | 90.73       | 96.48    |        |
|                                                    | Not yet, but will need to                                      | 4.71                                                      | 5.19  | 10.22      | 8.69       |                  | 6.34                                                         | 6.43        | 5.08        | 1.81     | <0.01  |
|                                                    | Yes                                                            | 3.85                                                      | 3.99  | 9.09       | 10.14      |                  | 4.7                                                          | 5.15        | 4.18        | 1.7      |        |
|                                                    | <7                                                             | 26.19                                                     | 17.04 | 22.47      | 17.39      |                  | 21.17                                                        | 30.35       | 26.04       | 22.72    |        |
| Index of socio-economic deprivation -score         | 7-8.5                                                          | 20.00                                                     | 10.22 | 20.12      | 10.14      |                  | 33.2                                                         | 28.42       | 32.07       | 36.36    |        |
|                                                    | 8.5-10                                                         | 32.09                                                     | 32.95 | 33.59      | 43.47      | <0.01            | 17.38                                                        | 18.8        | 19.27       | 24.3     | p<0.01 |
|                                                    | >10                                                            | 21.71                                                     | 39.77 | 23.8       | 28.98      |                  | 28.24                                                        | 22.41       | 22.6        | 16.59    |        |
|                                                    | No, I am forced to go to work                                  | 0.33                                                      | 0.55  | 2.29       | 1.44       |                  | 0.54                                                         | 0.56        | 0.4         | 0.1      |        |
|                                                    | No, I need to work                                             | 0.69                                                      | 1.51  | 1.14       | 1.44       |                  | 0.75                                                         | 0.79        | 0.88        | 1.3      |        |
| Staying home                                       | No, I work on essential services                               | 13.73                                                     | 12.39 | 13.79      | 7.24       | <0.01            | 16.36                                                        | 17.77       | 15.19       | 4.47     | p<0.01 |
|                                                    | Yes                                                            | 54.13                                                     | 57.73 | 43.67      | 62.31      |                  | 43.85                                                        | 39.51       | 48.13       | 87.39    |        |
|                                                    | Yes, teleworking                                               | 31.1                                                      | 27.79 | 39.08      | 27.53      |                  | 38.48                                                        | 41.35       | 38.37       | 6.71     |        |
|                                                    | No                                                             | 22.14                                                     | 38.44 | 26.26      | 37.68      |                  | 21.77                                                        | 23.06       | 26.82       | 35.04    |        |
|                                                    | Yes, going shopping                                            | 18.9                                                      | 13.39 | 17.17      | 10.14      |                  | 17.82                                                        | 18.59       | 16.69       | 16.19    |        |
| Afraid                                             | Yes, to infect others                                          | 23.89                                                     | 17.68 | 30.3       | 24.63      | <0.01            | 28.52                                                        | 24.76       | 22.13       | 13.85    | p<0.01 |
|                                                    | Yes, to get infected                                           | 35.04                                                     | 30.47 | 26.26      | 27.53      |                  | 31.87                                                        | 33.57       | 34.33       | 34.9     |        |
|                                                    | Elders                                                         | 36.23                                                     | 34.25 | 43.33      | 23.52      |                  | 42.05                                                        | 35.33       | 36.86       | 22.98    |        |
|                                                    | Anyone                                                         | 48.63                                                     | 51.26 | 50.00      | 70.58      |                  | 41.27                                                        | 41.49       | 54.17       | 69.79    |        |
|                                                    | Children                                                       | 13.32                                                     | 12.97 | 3.33       | 5.88       |                  | 14.28                                                        | 21.55       | 7.21        | 6.47     | p<0.01 |
| Afraid to infect                                   | Colleagues at work                                             | 1.81                                                      | 1.50  | 3.33       | 0.00       |                  | 2.38                                                         | 1.61        | 1.74        | 0.74     |        |
|                                                    | No                                                             | 55.2                                                      | 64.77 | 41.22      | 50.00      |                  | 42.95                                                        | 51.97       | 59.86       | 77.68    |        |
|                                                    | Yes, alcohol                                                   | 5.57                                                      | 6.74  | 8.77       | 9.75       |                  | 8.88                                                         | 7.23        | 5.01        | 2.47     |        |
|                                                    | Yes, food                                                      | 26.26                                                     | 19.40 | 22.8       | 20.73      | <0.01            | 33.04                                                        | 27.44       | 22.72       | 13.4     | p<0.01 |
|                                                    | Yes, illegal drugs                                             | 0.25                                                      | 0.73  | 5.26       | 2.43       |                  | 1.07                                                         | 0.28        | 0.16        | 0.09     |        |
| Media to get information about the pandemic        | Yes, drugs to calm down                                        | 4.83                                                      | 2.44  | 8.77       | 6.09       |                  | 4.24                                                         | 4.99        | 4.27        | 3.07     |        |
|                                                    | Yes, tobacco                                                   | 7.85                                                      | 5.89  | 13.15      | 10.97      |                  | 9.79                                                         | 8.06        | 7.95        | 3.27     |        |
|                                                    | Social media                                                   | 30.09                                                     | 27.20 | 35.00      | 30.88      |                  | 7.49                                                         | 5.45        | 3.41        | 1.49     |        |
|                                                    | TV                                                             | 37.48                                                     | 35.18 | 28.33      | 31.61      |                  | 50.54                                                        | 50.41       | 50.08       | 48.38    |        |
|                                                    | Radio                                                          | 14.94                                                     | 16.67 | 10.00      | 12.5       |                  | 13.74                                                        | 20.14       | 22.9        | 25.1     |        |
| Thoughts about the information received            | Newspapers                                                     | 12.83                                                     | 15.18 | 15.00      | 11.76      |                  | 19.17                                                        | 16.7        | 17.07       | 20.19    |        |
|                                                    | Other                                                          | 4.63                                                      | 5.74  | 11.66      | 13.23      |                  | 9.03                                                         | 7.27        | 6.52        | 4.82     |        |
|                                                    | It's ok                                                        | 19.28                                                     | 18.40 | 6.33       | 13.18      |                  | 9.76                                                         | 17.8        | 28.13       | 26.74    |        |
|                                                    | The Government explains too much                               | 2.65                                                      | 4.55  | 0.00       | 2.19       |                  | 1.44                                                         | 2.28        | 3.88        | 6.66     |        |
|                                                    | The Government explains too less                               | 9.06                                                      | 8.60  | 14.08      | 9.89       | <0.01            | 8.99                                                         | 8.56        | 9.7         | 8.53     | <0.01  |
| Impact of the pandemic on people (subjective)      | Media explain too much                                         | 12.49                                                     | 13.43 | 11.97      | 8.79       |                  | 9.69                                                         | 10.46       | 14.32       | 19.21    |        |
|                                                    | Media explain too less                                         | 2.8                                                       | 3.11  | 5.63       | 8.79       |                  | 2.68                                                         | 2.69        | 3.53        | 2.96     |        |
|                                                    | Too negative                                                   | 20.47                                                     | 21.90 | 25.35      | 18.68      |                  | 41.88                                                        | 26.09       | 0.24        | 0.11     |        |
|                                                    | Poorly adjusted to the reality                                 | 27.34                                                     | 25.60 | 30.98      | 29.67      |                  | 21.13                                                        | 25.61       | 33.57       | 31.12    |        |
|                                                    | I do not think anything about it                               | 5.87                                                      | 4.36  | 5.63       | 8.79       |                  | 4.38                                                         | 6.47        | 6.6         | 4.64     |        |
| Contact with someone infected by SARS-CoV-2        | No                                                             | 18.11                                                     | 29.88 | 23.07      | 23.25      |                  | 17.23                                                        | 19.43       | 21.13       | 28.05    |        |
|                                                    | Yes, my personality                                            | 5.18                                                      | 3.71  | 9.4        | 5.81       | <0.01            | 8.17                                                         | 5.85        | 3.39        | 2.02     | <0.01  |
|                                                    | Yes, my vision of the society/ ho                              | 51.74                                                     | 47.05 | 43.58      | 50.00      |                  | 50.98                                                        | 51.86       | 52.4        | 46.36    |        |
|                                                    | Yes, my life                                                   | 24.95                                                     | 19.34 | 23.93      | 20.93      |                  | 23.6                                                         | 23.14       | 23.17       | 23.56    |        |
|                                                    | I do not know                                                  | 79.01                                                     | 82.93 | 70.32      | 82.6       |                  | 75.00                                                        | 76.77       | 79.62       | 88.72    |        |
| Presence of symptoms (since February)              | Yes, with a probable non-confirmed case                        | 10.16                                                     | 9.01  | 16.48      | 5.79       | <0.01            | 13.05                                                        | 11.61       | 9.79        | 5.14     | <0.01  |
|                                                    | Yes, with a confirmed case                                     | 10.81                                                     | 8.04  | 13.18      | 11.59      |                  | 11.93                                                        | 11.61       | 10.58       | 6.12     |        |
|                                                    | No                                                             | 22.92                                                     | 35.72 | 11.29      | 37.75      |                  | 15.55                                                        | 20.98       | 28.09       | 46.06    |        |
|                                                    | Headache                                                       | 17.06                                                     | 13.02 | 13.7       | 8.16       |                  | 17.59                                                        | 18.01       | 16.29       | 10.81    |        |
|                                                    | Sore throat                                                    | 10.51                                                     | 7.95  | 9.27       | 13.26      |                  | 10.81                                                        | 10.59       | 9.47        | 7.96     |        |
| How did they feel when answering the questionnaire | Nasal congestion/running nose                                  | 9.1                                                       | 9.37  | 10.08      | 12.24      |                  | 12.06                                                        | 9.05        | 8.28        | 6.2      |        |
|                                                    | Extreme fatigue/bredness                                       | 7.47                                                      | 5.30  |            |            |                  |                                                              |             |             |          |        |
